# Supplementary material for: Comparative characterization of amino acids in Abelmoschus manihot roots, stems and leaves during different growth periods by UPLC-TQ-MS/MS
Source: Royal Society of Chemistry journal article supplement (doi:10.1039/c5ay02103k), 2015-01-01
Supplement: c5ay02103k2.pdf [file c5ay02103k2.pdf]

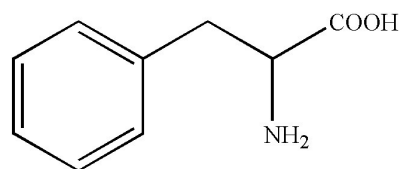

**Phenylalanine (1)**

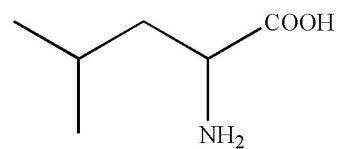

**Leucine (2)**

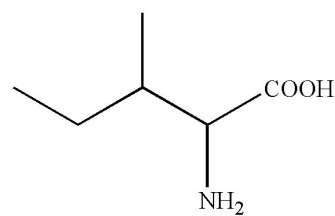

**Isoleucine (3)**

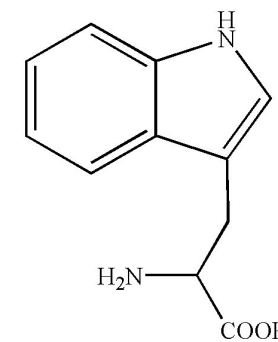

**Tryptophan (4)**

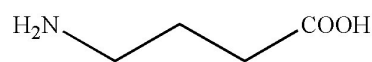

**GABA (5)**

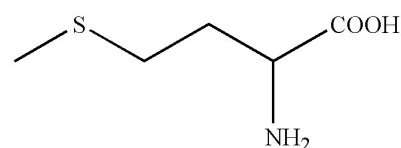

**Methionine (6)**

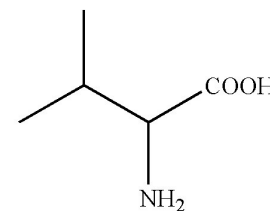

**Valine (7)**

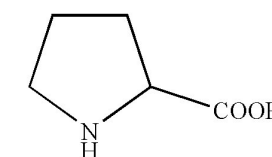

**Proline (8)**

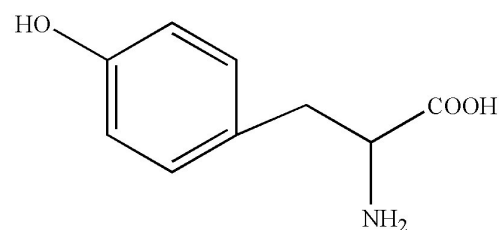

**Tyrosine (9)**

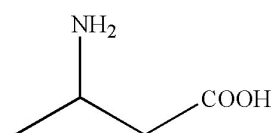

**Alanine (10)**

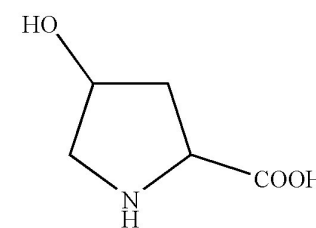

**Hydroxyproline (11)**

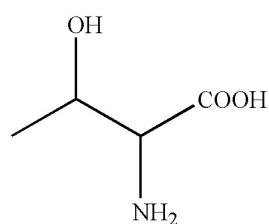

**Threonine (12)**

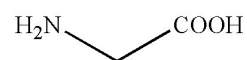

**Glycine (13)**

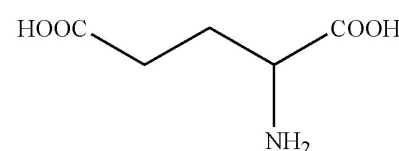

**Glutamate (14)**

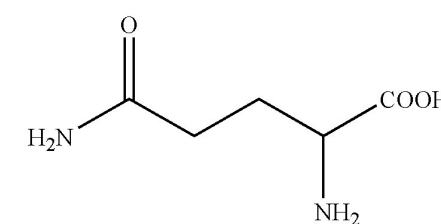

**Glutamine (15)**

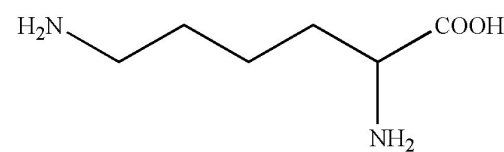

**Lysine (16)**

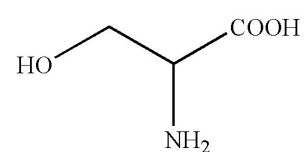

**Serine (17)**

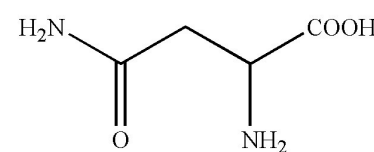

**Asparagine (18)**

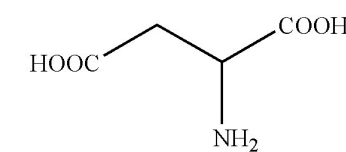

**Aspartic acid (19)**

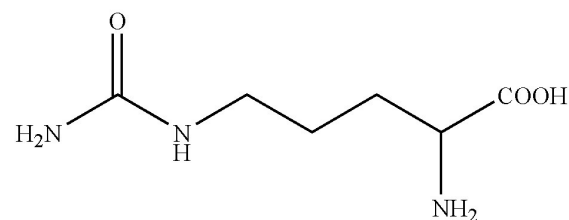

**Citrulline (20)**

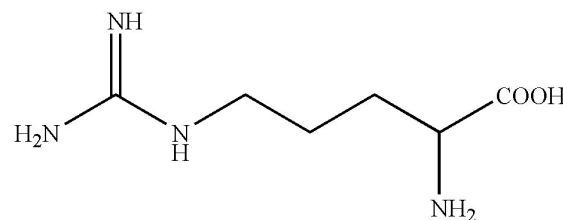

**Arginine (21)**

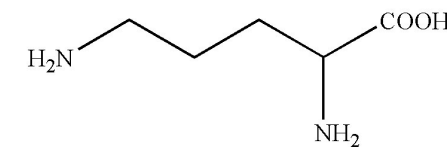

**Ornithine (22)**
